# Supplementary material for: Soil bacterial community and functional shifts in response to thermal insulation in moist acidic tundra of Northern Alaska
Source: Copernicus journal article supplement (doi:10.5194/soil-2015-89), 2016-01-18

## Supplemental Information

**Table S1** - List of targeted KEGG ortholog enzymes

| Functional role                 | Enzyme name                               | EC number           | KEGG orthology number                  |
|---------------------------------|-------------------------------------------|---------------------|----------------------------------------|
| <b>PRESENT IN SAMPLES</b>       |                                           |                     |                                        |
| Arabinoside degradation         | arabinogalactan endo-beta-1,4-galactanase | 3.2.1.89            | K01224                                 |
|                                 | arabinan endo-1,5-alpha-L-arabinanase     | 3.2.1.99            | K06113                                 |
| Cellulose degradation           | cellulase                                 | 3.2.1.4             | K01179                                 |
|                                 | beta-glucosidase                          | 3.2.1.21            | K01188, K05349, K05350                 |
|                                 | cellulose 1,4-beta-cellobiosidase (CBH)   | 3.2.1.91            | K01225                                 |
| Chitin degradation              | chitinase (NAG)                           | 3.2.1.14            | K01183                                 |
|                                 | bifunctional chitinase/lysozyme           | 3.2.1.14 & 3.2.1.17 | K13381                                 |
| Nitrogen mobilization           | leucyl aminopeptidase (LAP)               | 3.4.11.1            | K01255                                 |
|                                 | urease                                    | 3.5.1.5             | K01427, K01428, K01429, K01430, K14048 |
| Lignin degradation              | tyrosinase (phenol oxidase)               | 1.14.18.1           | K00505                                 |
| Pectin degradation              | polygalacturonase                         | 3.2.1.15            | K01184                                 |
|                                 | alpha-L-rhamnosidase                      | 3.2.1.40            | K05989                                 |
| Phosphate mobilization          | alkaline phosphatase (AP)                 | 3.1.3.1             | K01077, K01113                         |
|                                 | acid phosphatase (AP)                     | 3.1.3.2             | K01078, K01093, K09474, K03788, K14379 |
| Superoxides                     | superoxide dismutase                      | 1.15.1.1            | K00518, K04564, K04565                 |
|                                 | superoxide reductase                      | 1.15.1.2            | K05919                                 |
| Xylan degradation               | xylan 1,4-beta-xylosidase                 | 3.2.1.37            | K01198                                 |
| <b>NOT FOUND IN ANY SAMPLES</b> |                                           |                     |                                        |
|                                 | polyphenol oxidase                        | 1.10.3.1            | K00422                                 |
|                                 | peroxidase                                | 1.11.1.7            | K00430                                 |

|                                                             |                                   |        |
|-------------------------------------------------------------|-----------------------------------|--------|
| fructan beta-fructosidase                                   | 3.2.1.80                          | K03332 |
| laccase (oxidoreductase)                                    | 1.10.3.2                          | K05909 |
| eosinophil peroxidase                                       | 1.11.1.7                          | K10788 |
| cytosol aminopeptidase                                      | 3.4.11.1 & 3.4.11.5               | K11142 |
| peroxiredoxin 6, 1-Cys peroxiredoxin                        | 1.11.1.7, 1.11.1.15, &<br>3.1.1.- | K11188 |
| lactoperoxidase                                             | 1.11.1.7                          | K12550 |
| low molecular weight phosphotyrosine<br>protein phosphatase | 3.1.3.2 3.1.3.48                  | K14394 |
| lysophosphatidic acid phosphatase type 6                    | 3.1.3.2                           | K14395 |
| acid phosphatase                                            | 3.1.3.2                           | K14410 |
| beta-D-xylosidase 4                                         | 3.2.1.37                          | K15920 |

## Linear Regressions of bacterial abundance and gene abundance to soil C and N content

Bacterial relative abundance (from most abundant phylum to least abundant)

Fig. S1

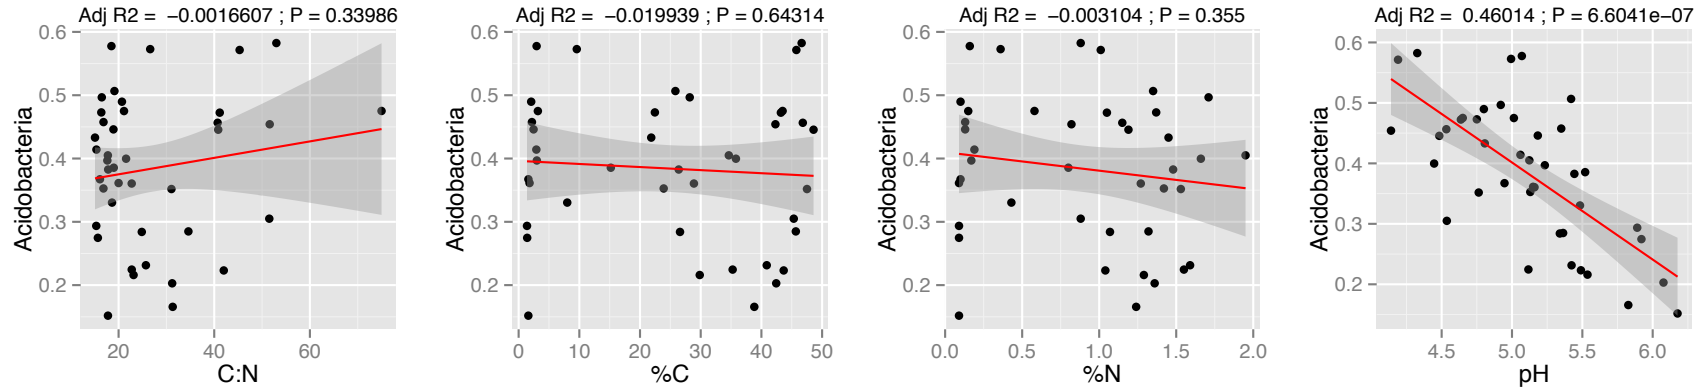

Fig. S2

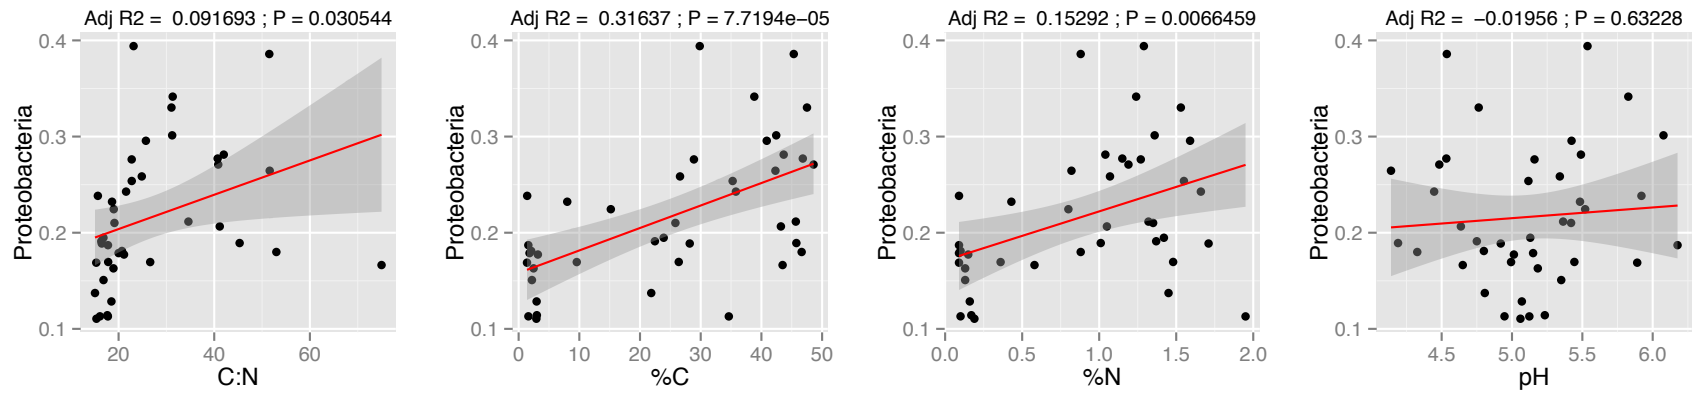

Fig. S3

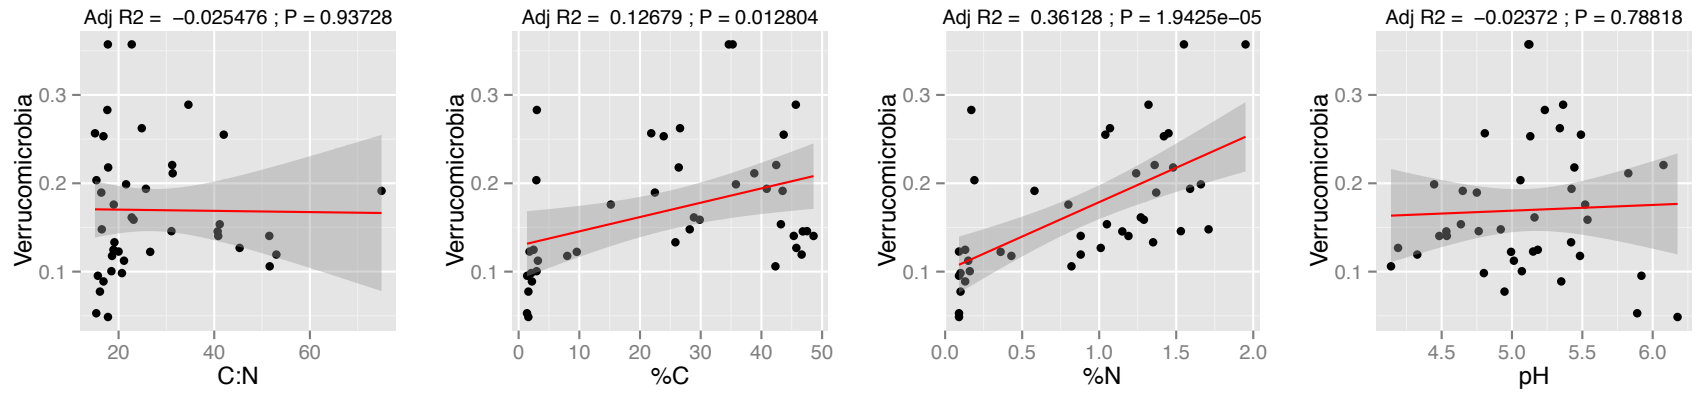

Fig. S4

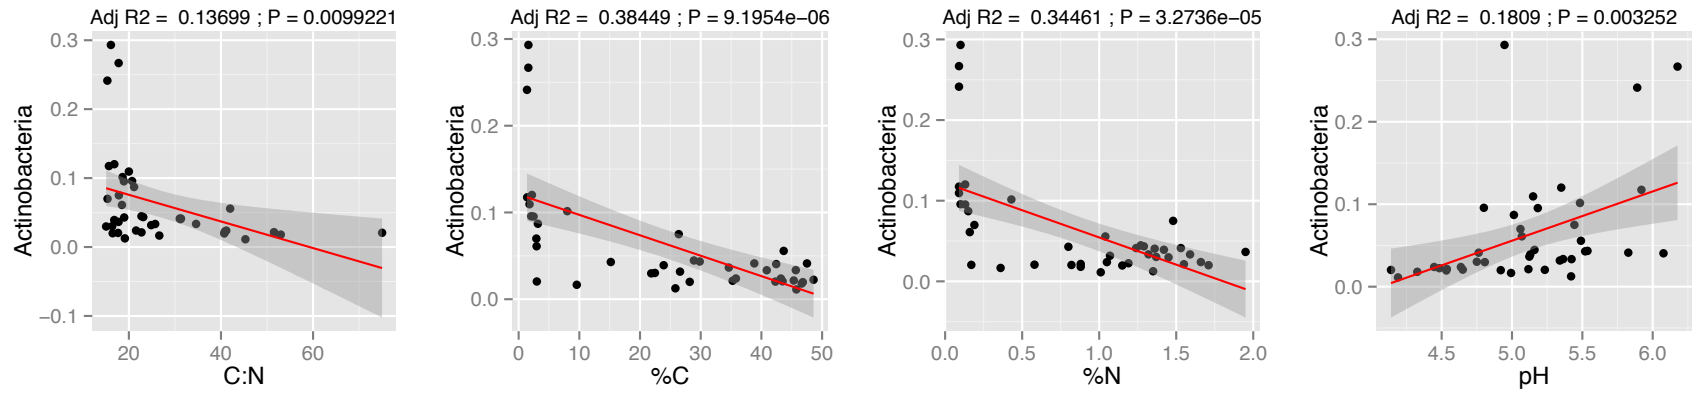

Fig. S5

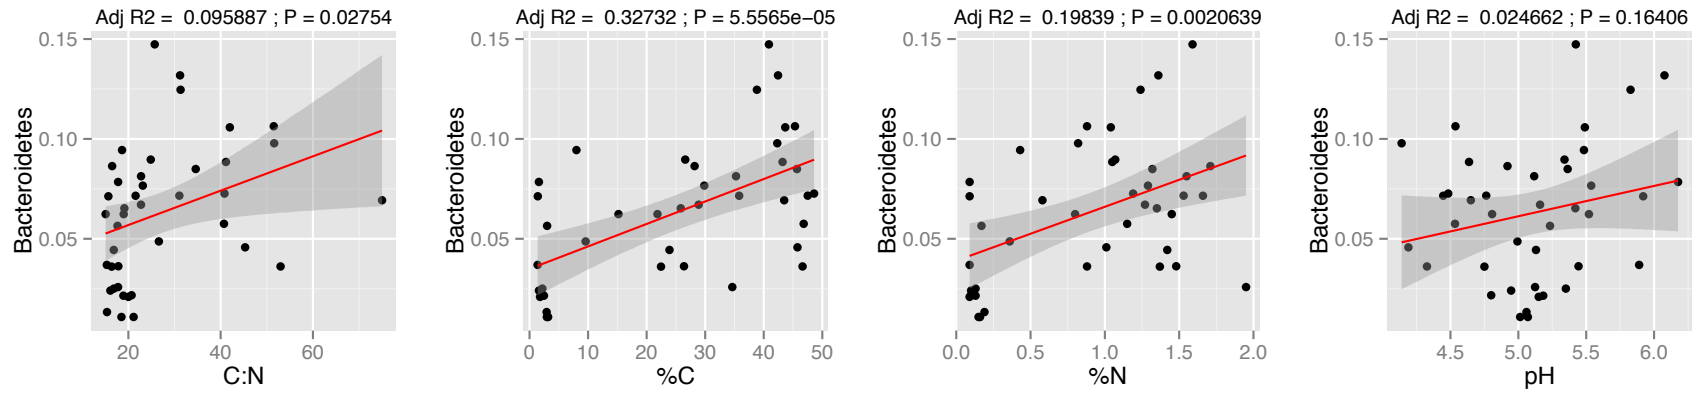

Fig. S6

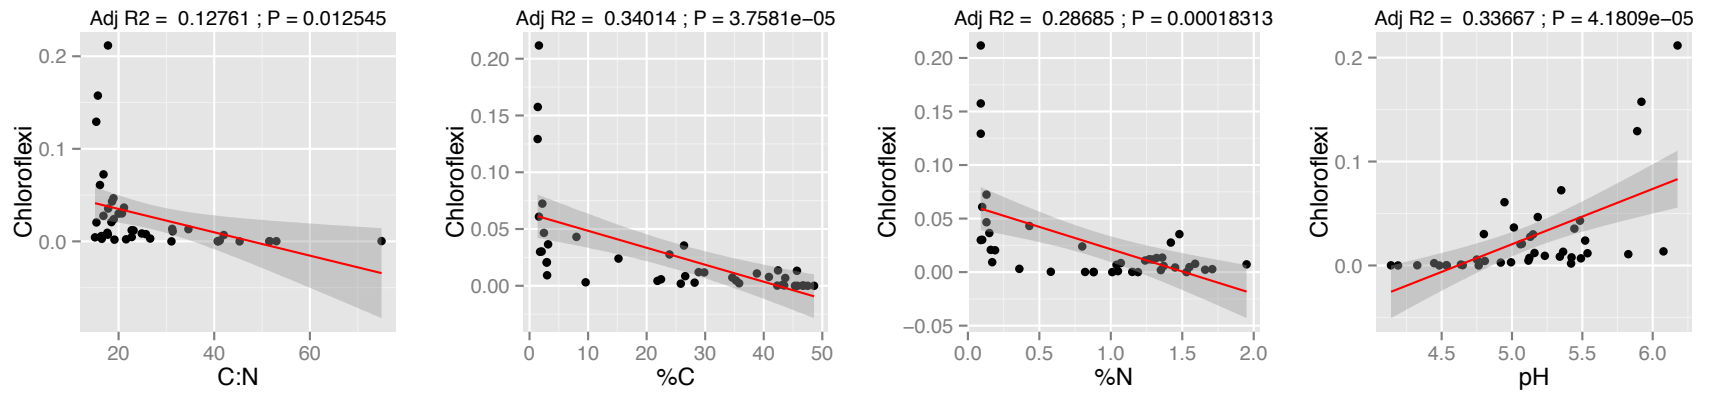

## Enzyme gene abundance

Fig. S7

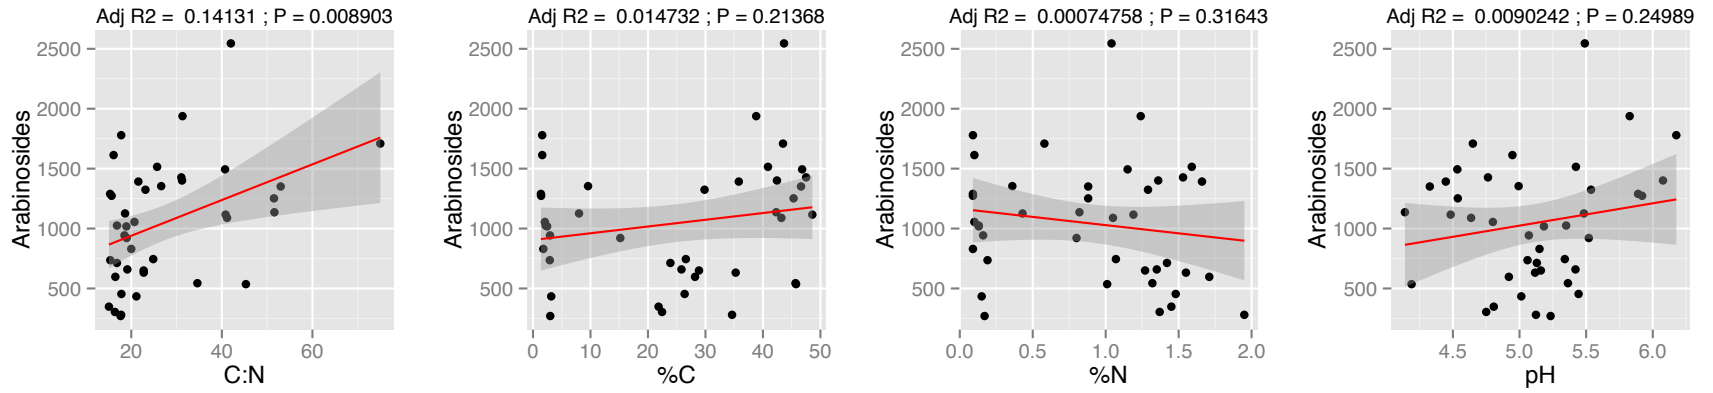

Fig. S8

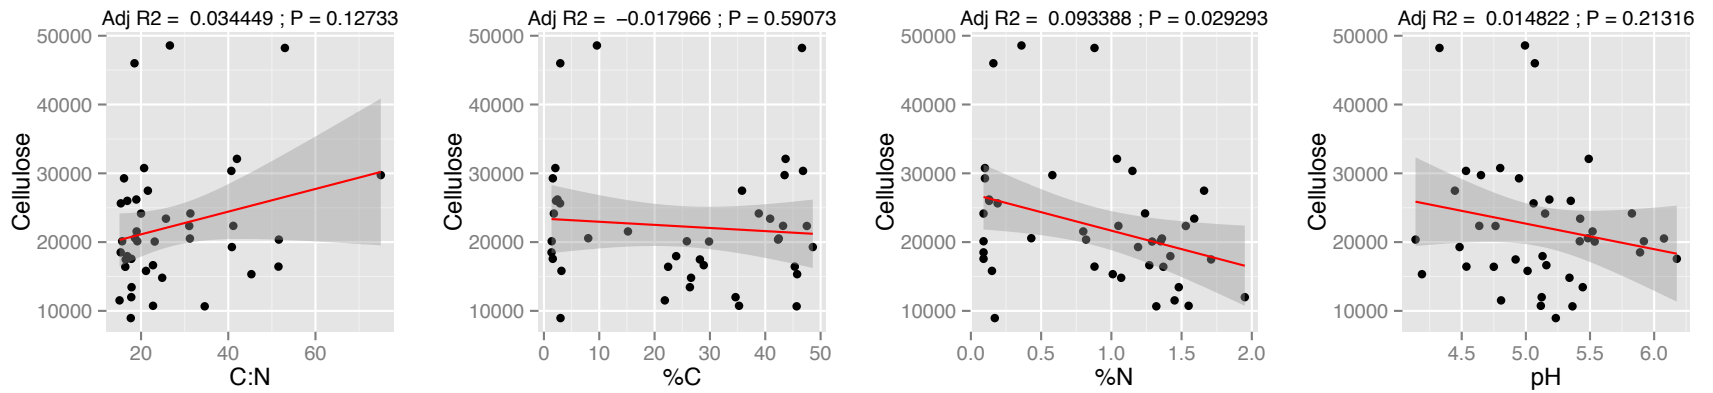

Fig. S9

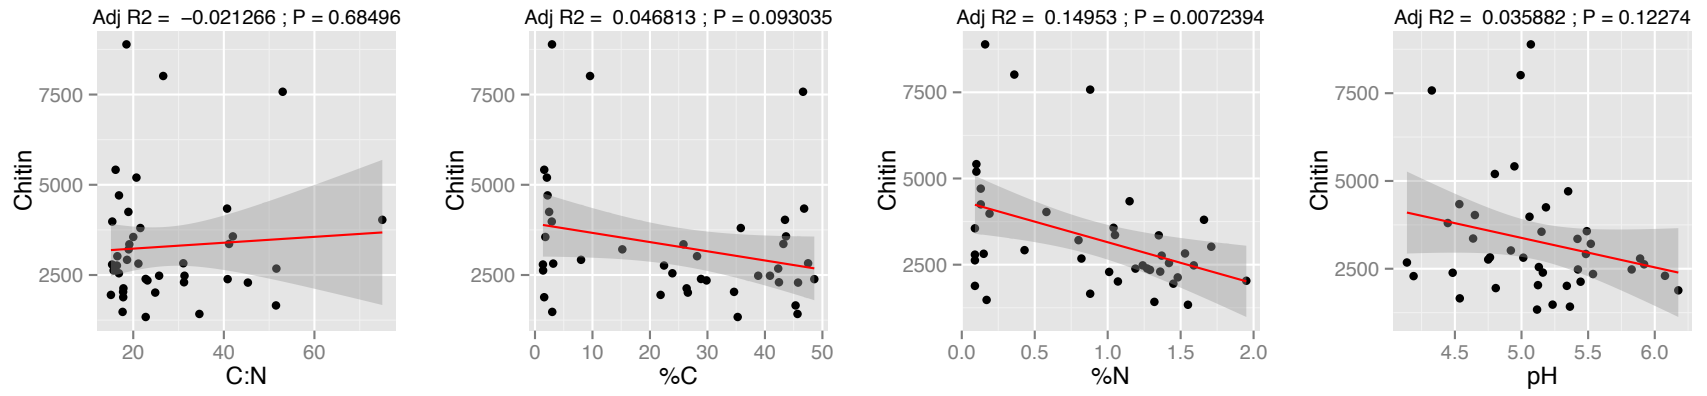

Fig. S10

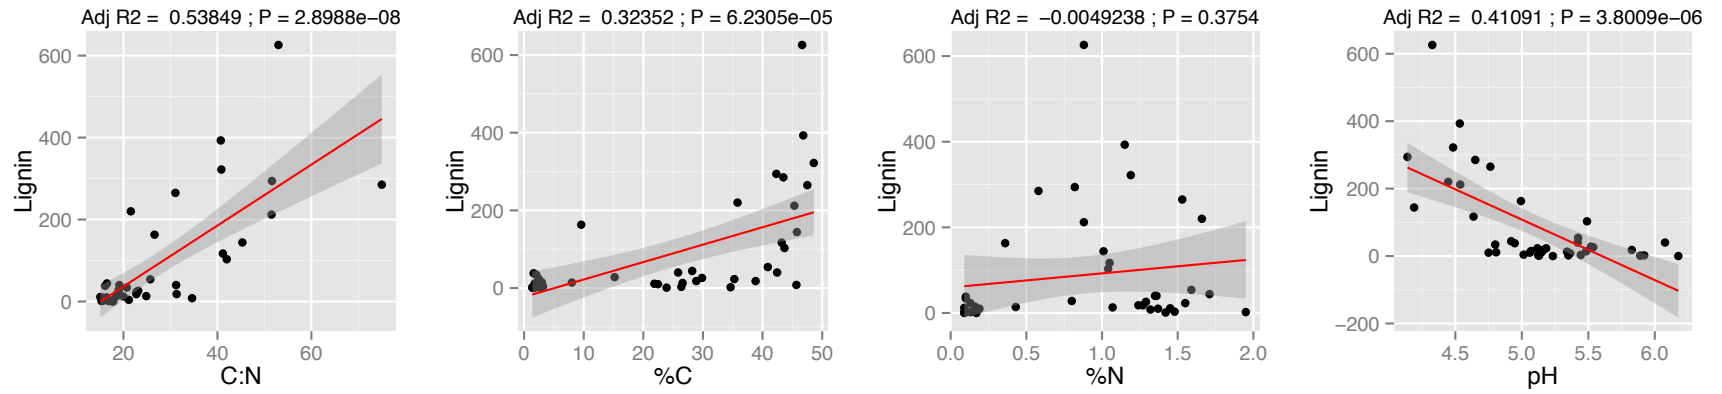

Fig. S11

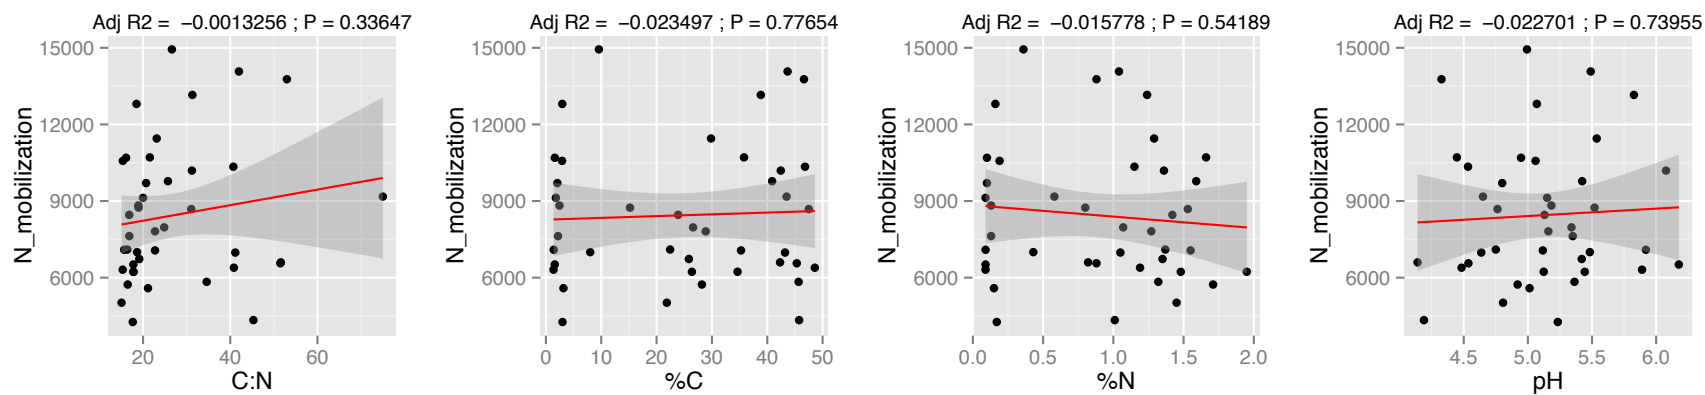

Fig. S12

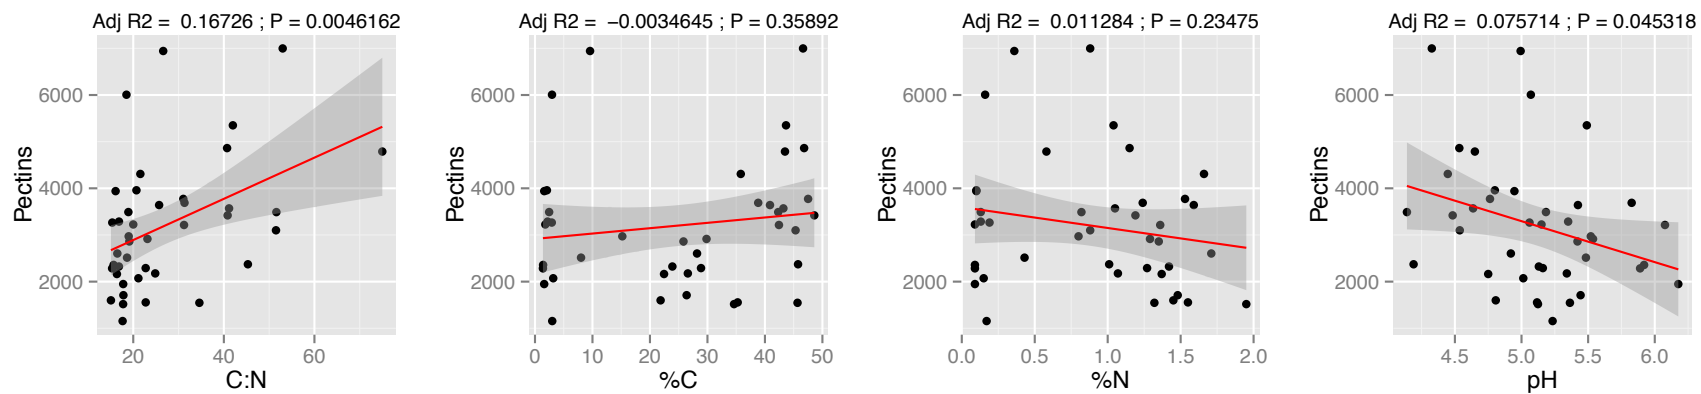



Fig. S13

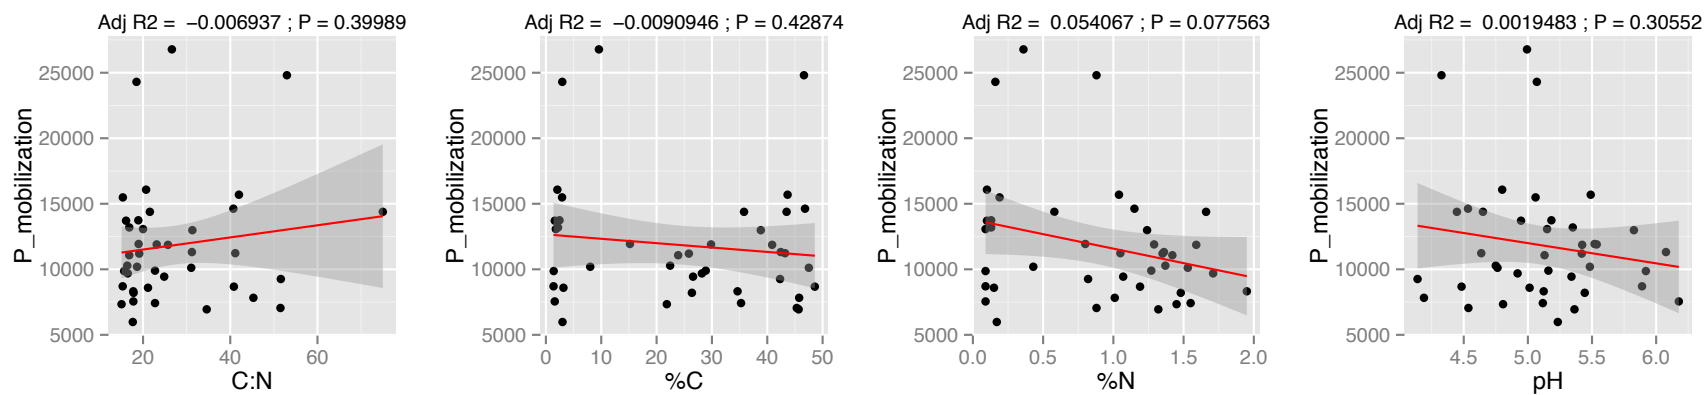

Fig. S14

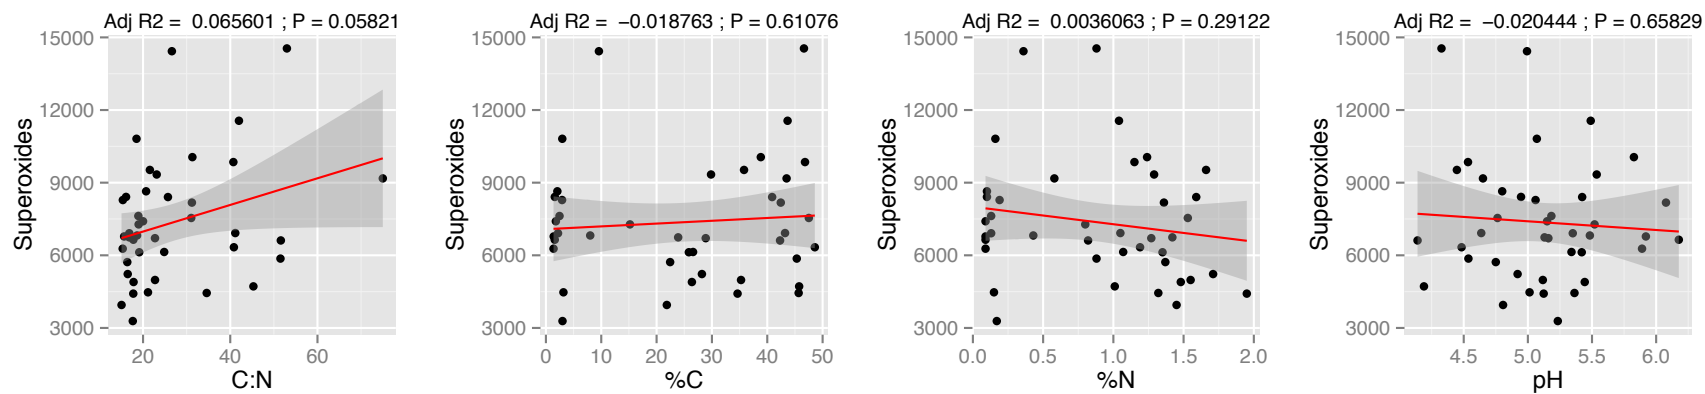

Fig. S15

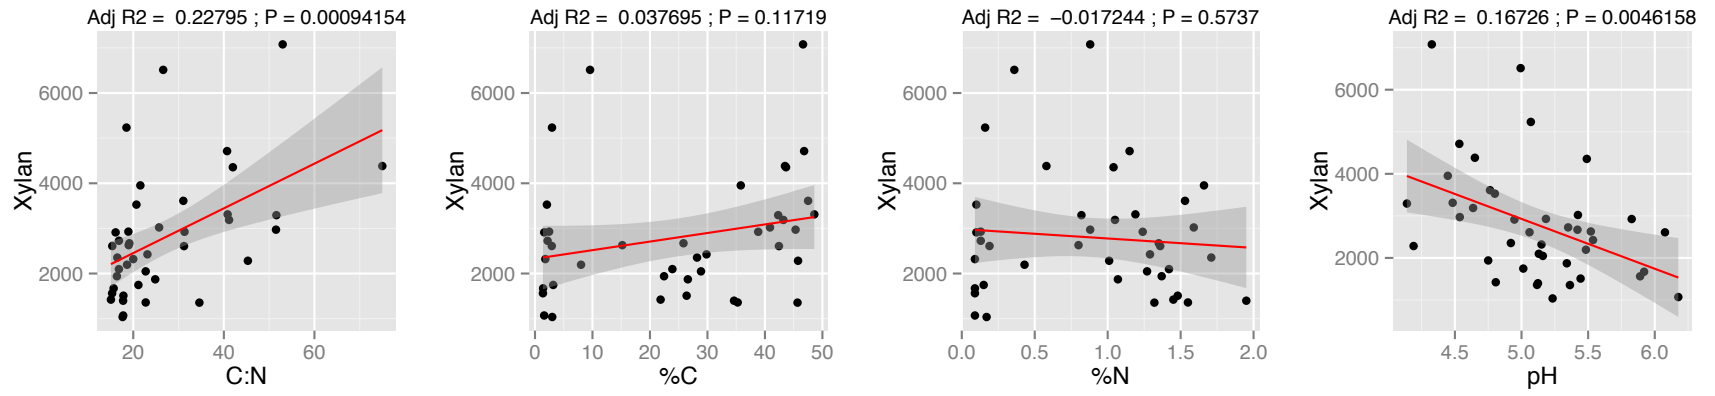

Supplement: Supplementary file 1 [file soil-2015-89-supplement.pdf]
